# Supplementary material for: Preparation of 3D graphene networks and a C dot grafted graphene hybrid by new methods for improving the photovoltaic performance of CdS/CdSe quantum dot sensitized solar cells
Source: Royal Society of Chemistry journal article supplement (doi:10.1039/c5tc04101e), 2016-01-01
Supplement: c5tc04101e1.pdf [file c5tc04101e1.pdf]

† Electronic supplementary information (ESI)

**Preparation of 3D graphene networks and C dots grafted graphene  
hybrid by new methods for improving photovoltaic performance of  
CdS/CdSe quantum dot sensitized solar cells**

Rui Zhang,<sup>a</sup> Baochang Zhang,<sup>b</sup> Yingbo Liu,<sup>a</sup> and Shuqing Sun<sup>\*a</sup>

<sup>a</sup>Department of Chemistry, College of Science, Tianjin University, Tianjin, 300072, China.

<sup>b</sup>College of Chemistry and Life Sciences, Changchun University of Technology, Chang Chun, 130012, China.

Corresponding Author: sunshuqing@tju.edu.cn

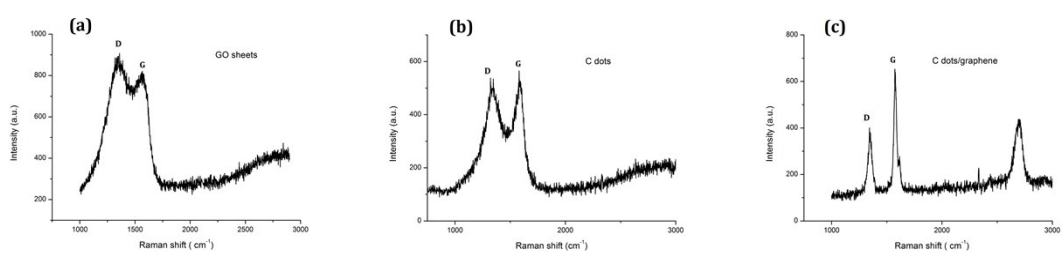

**Fig. S1.** (a) Raman spectrum of GO sheets, (b) Raman spectrum of C dots, (c) Raman spectrum of C dots/graphene hybrid.

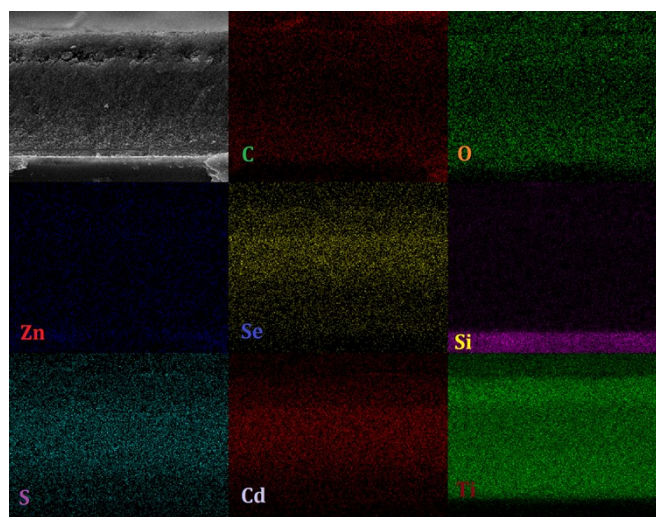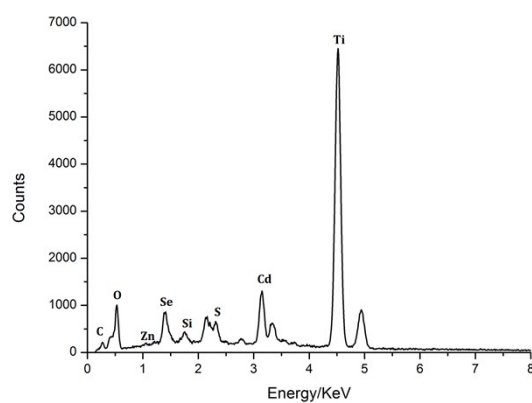

**Fig. S2.** The cross-section SEM image of the as-prepared CdS/CdSe sensitized CD-G/TiO<sub>2</sub> film and corresponding EDX elemental mapping.

Table. S1 Parameters for CdS/CdSe sensitized solar cells based on the different photoanodes with different CdS and CdSe cycles

| Photoanode       | $J_{sc}$ (mA/cm <sup>2</sup> ) | $V_{oc}$ (V) | FF (%) | $\eta$ (%) |
|------------------|--------------------------------|--------------|--------|------------|
| CdS(1c)/CdSe(1c) | 4.21                           | 0.401        | 0.42   | 0.71       |
| CdS(2c)/CdSe(2c) | 6.01                           | 0.472        | 0.47   | 1.33       |
| CdS(3c)/CdSe(3c) | 7.34                           | 0.498        | 0.48   | 1.75       |
| CdS(4c)/CdSe(4c) | 9.01                           | 0.521        | 0.53   | 2.48       |
| CdS(5c)/CdSe(5c) | 10.14                          | 0.543        | 0.58   | 3.24       |
| CdS(6c)/CdSe(6c) | 11.65                          | 0.559        | 0.62   | 4.04       |
| CdS(7c)/CdSe(7c) | 11.36                          | 0.558        | 0.61   | 3.87       |

Table. S2 Parameters for CdS/CdSe sensitized solar cells based on the different photoanodes with different GN contents

| Photoanode                  | $J_{sc}$ (mA/cm <sup>2</sup> ) | $V_{oc}$ (V) | FF (%) | $\eta$ (%) |
|-----------------------------|--------------------------------|--------------|--------|------------|
| 0 wt% GN/TiO <sub>2</sub>   | 11.65                          | 0.559        | 0.62   | 4.04       |
| 0.4 wt% GN/TiO <sub>2</sub> | 11.96                          | 0.576        | 0.61   | 4.20       |
| 0.8 wt% GN/TiO <sub>2</sub> | 12.18                          | 0.575        | 0.61   | 4.27       |
| 1.2 wt% GN/TiO <sub>2</sub> | 12.51                          | 0.577        | 0.60   | 4.33       |
| 1.6 wt% GN/TiO <sub>2</sub> | 12.62                          | 0.578        | 0.60   | 4.37       |
| 2.0 wt% GN/TiO <sub>2</sub> | 12.03                          | 0.576        | 0.59   | 4.08       |

Table. S3 Parameters for CdS/CdSe sensitized solar cells based on the different photoanodes with different CD-G contents

| Photoanode                    | $J_{sc}$ (mA/cm <sup>2</sup> ) | $V_{oc}$ (V) | FF (%) | $\eta$ (%) |
|-------------------------------|--------------------------------|--------------|--------|------------|
| 0 wt% CD-G/TiO <sub>2</sub>   | 11.65                          | 0.559        | 0.62   | 4.04       |
| 0.4 wt% CD-G/TiO <sub>2</sub> | 12.17                          | 0.575        | 0.61   | 4.27       |
| 0.8 wt% CD-G/TiO <sub>2</sub> | 12.50                          | 0.576        | 0.60   | 4.32       |
| 1.2 wt% CD-G/TiO <sub>2</sub> | 12.95                          | 0.577        | 0.60   | 4.48       |
| 1.6 wt% CD-G/TiO <sub>2</sub> | 13.49                          | 0.579        | 0.59   | 4.60       |
| 2.0 wt% CD-G/TiO <sub>2</sub> | 13.71                          | 0.580        | 0.59   | 4.69       |
| 2.4 wt% CD-G/TiO <sub>2</sub> | 12.43                          | 0.576        | 0.58   | 4.15       |

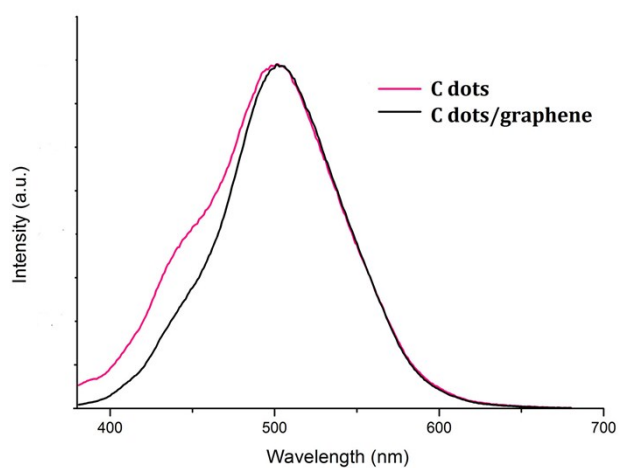

**Fig. S3** Normalized the PL spectra on the dots and CD-G.

**Fig. S3**

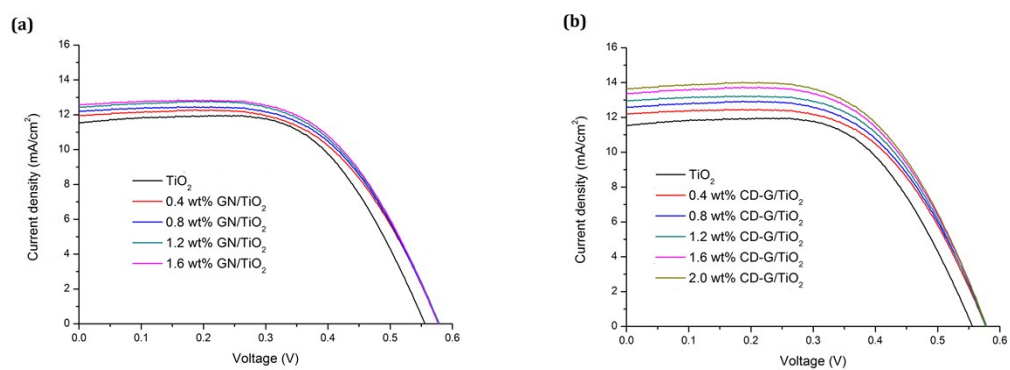

**Fig. S4**  $J$ - $V$  curves of CdS/CdSe QDSSCs based on different contents of GN or CD-G in  $\text{TiO}_2$  photoanodes.
